# Supplementary material for: Pechini-type in-situ polymerizable complex (IPC) method applied to the synthesis of Y2O3:Ln (Ln = Ce or Eu) nanocrystallitesElectronic supplementary information (ESI) available: EDX spectra of calcined Y2O3:Ce and Y2O3:Eu samples. See http://www.rsc.org/suppdata/jm/b3/b309606h/
Source: Royal Society of Chemistry journal article supplement (doi:10.1039/b309606h), 2004-01-01
Supplement: b309606h.doc [file b309606h.doc]

Supplementary data:

**Fig.1s** EDX spectrum of calcined Y2O3:Ce (600 ºC, 30 min) prepared from a 0.075 M YCl3, EuCl3 precursor mixture after a 30-min reaction at 200 ºC. C and Cu are from the TEM grid and Al is from the sample holder.

**Fig.2s** EDX spectrum of calcined Y2O3:Eu (600 ºC, 30 min) prepared from a 0.075 M Y(NO3)3, Eu(NO3)3 precursor mixture after a 30-min reaction at 200 ºC. C and Cu are from the TEM grid and Al is from the sample holder.

Pechini-type in-situ polymerizable complex (IPC) method

applied to the synthesis of Y2O3:Ln (Ln = Ce or Eu) nanocrystallites
